# Supplementary material for: Concomitant and previous osteoporotic vertebral fractures
Source: PubMed Central journal article supplement — Acta Orthop. 2017 Jan 6;88(2):192–7. doi: 10.1080/17453674.2016.1273644 (PMC5385115; doi:10.1080/17453674.2016.1273644), 2017-01-06
Supplement: IORT_A_1273644_SM8685.pdf [file IORT_A_1273644_SM8685.pdf]

## Supplementary data

### Logistic regression for concomitant fractures of the spine in patients with acute vertebral fractures

|                              | p-value | OR   | 95% CI for OR |
|------------------------------|---------|------|---------------|
| Age                          | 0.5     | 0.99 | 0.97–1.02     |
| Gender                       | 1.0     | 1.01 | 0.55–1.84     |
| Number of previous fractures |         |      |               |
| Total                        | 0.03    | 0.87 | 0.74–0.99     |
| T1–T9                        | 0.007   | 0.47 | 0.27–0.81     |
| T10–L2                       | 0.7     | 1.11 | 0.67–1.82     |
| L3–L5                        | 0.8     | 0.93 | 0.54–1.60     |
| DEXA                         | 0.003   | 0.72 | 0.58–0.89     |
| Back pain                    | 0.7     | 1.69 | 0.17–17.1     |
| Sciatica                     | 0.04    | 0.51 | 0.27–0.96     |
| Paresis                      | 0.4     | 2.14 | 0.40–11.5     |
| Constant                     | 0.3     | 0.26 |               |

CI: confidence interval; OR: odds ratio;  
DEXA: dual-energy X-ray absorptiometry.
